# Supplementary material for: Expression Profile of Micrornas (106b-3p, 130b-3, 145-3p and 199a-5p) in Urine and Serum Samples From Patients With the Diagnosis of Bladder Cancer
Source: Research Square preprint supplement (doi:10.21203/rs.3.rs-86217/v1), 2020-10-08
Supplement: Supplementary file 1 [file c20824a2951017786d3b4934.xlsx]

## Sheet: Arkusz1
										miRNA 130b-3				TB1										ΔCt kalibrator
próbka	płeć	wiek	P- pali K-kiedyś palił N- nie pali	narażenie zawodowe	stopień zaawansowania histologicznego nwotworu	stopień zaawansowania klinicznego nwotworu	przyczyna zgłoszenia do lekarza	wznowa	rodzaj próbki	Ct1	Ct2	Ctśr	SD	Ct1	Ct2	Ctśr	SD	ΔCt próbki	ΔΔCt	Ekspresja				2.17809
W202m	M	60	P	-	G1	pTa	krwiomocz, bóle podbrzusza	NIE	serum +urine	32.39	32.79	32.59	0.28	29.29	29.15	29.22	0.1	3.37	1.2	0.44
W208m	M	84	K	+	G3	pT2	krwiomocz	NIE	serum +urine	30.2	29.9	30.05	0.21	28.99	28.91	28.95	0.06	1.09	-1.08	2.12
W200m	K	59	P	-	G2	pTa	krwiomocz	TAK	serum +urine	30.02	29.52	29.77	0.35	29.59	30.13	29.86	0.38	-0.09	-2.27	4.81
W201m	M	61	P	+	G2	pT2	krwiomocz+ skrzepy krwi w moczu, zatrzymanie moczu	NIE	serum +urine	28.77	28.07	28.42	0.49	29	28.81	28.91	0.13	-0.48	-2.66	6.32
W205m	M	65	N	-	G1	pTa	krwiomocz	NIE	serum +urine	30.77	31.48	31.12	0.5	28.59	28.49	28.54	0.07	2.59	0.41	0.75
W203m	K	51	N	-	G1	pTa	częstomocz, parcie na mocz	NIE	serum +urine	29.11	28.91	29.01	0.14	27.73	28	27.87	0.19	1.14	-1.03	2.05
W207m	M	56	K	-	G3	pT2	krwiomocz+ skrzepy krwi w moczu	NIE	serum +urine	28.36	28.34	28.35	0.01	28.37	28.71	28.54	0.24	-0.18	-2.36	5.14
W200	K	59	P	-	G2	pTa	krwiomocz	TAK	serum +urine	34.2	34.01	34.11	0.13	28.92	28.83	28.87	0.06	5.23	3.06	0.12
W201	M	61	P	+	G2	pT2	krwiomocz+ skrzepy krwi w moczu, zatrzymanie moczu	NIE	serum +urine	32.58	32.38	32.48	0.14	28.91	28.79	28.85	0.08	3.63	1.45	0.37
W202	M	60	P	-	G1	pTa	krwiomocz, bóle podbrzusza	NIE	serum +urine	33.12	32.72	32.92	0.28	29.09	29.16	29.13	0.05	3.79	1.62	0.33
W104	M	65	K	-	G2	pT1	krwiomocz	NIE	serum	33.11	33.09	33.1	0.01	29.35	29.15	29.25	0.14	3.85	1.67	0.31
W106	M	69	K	-	G3	pT1	krwiomocz	NIE	serum	32.33	31.63	31.98	0.49	29.6	29.5	29.55	0.07	2.43	0.25	0.84
W108	K	82	K	-	G2	pT2	krwiomocz	NIE	serum	35.41	35.39	35.4	0.01	29.12	29.04	29.08	0.06	6.32	4.14	0.06
W47	M	85	K	-	G3	pT2	krwiomocz	TAK	serum	32.66	33.37	33.01	0.5	29.82	30.16	29.99	0.24	3.03	0.85	0.55
W115	M	62	K	-	G2	pT2	krwiomocz	NIE	serum	31.75	32.06	31.91	0.22	29.23	29.47	29.35	0.17	2.56	0.38	0.77
W117	K	76	K	-	G2	pT1	krwiomocz	NIE	serum	34.71	35.12	34.92	0.29	29.07	28.99	29.03	0.06	5.89	3.71	0.08
W193	M	63	P	-	G2	pT2	krwiomocz+ skrzepy krwi w moczu	NIE	serum	31.93	31.64	31.79	0.21	28.83	28.73	28.78	0.07	3.01	0.83	0.56
W194	K	77	K	-	G2	pT1	krwiomocz+ skrzepy krwi w moczu	NIE	serum	38.15	38.26	38.21	0.08	29.2	29.13	29.16	0.05	9.04	6.87	0.01
W195	M	73	K	+	G3	pT1	krwiomocz	NIE	serum	31.74	31.45	31.59	0.21	29.49	29.41	29.45	0.06	2.14	-0.04	1.03
W197	K	64	K	-	G2	pTa	krwiomocz	NIE	serum	33.15	33.06	33.1	0.06	29.38	29.35	29.37	0.02	3.73	1.55	0.34
W203	K	51	N	-	G1	pTa	częstomocz, parcie na mocz	NIE	serum +urine	37.82	38.53	38.17	0.5	29.06	29	29.03	0.04	9.15	6.97	0.01
W204	M	66	P	-	G1	pTa	krwiomocz	NIE	serum	32.69	32.4	32.55	0.21	29.21	29.1	29.16	0.08	3.39	1.21	0.43
W205	M	65	N	-	G1	pTa	krwiomocz	NIE	serum +urine	34.13	34.84	34.48	0.5	28.9	28.8	28.85	0.07	5.63	3.46	0.09
W207	M	56	K	-	G3	pT2	krwiomocz+ skrzepy krwi w moczu	NIE	serum +urine	35.16	35.57	35.37	0.29	29.48	29.69	29.59	0.15	5.78	3.6	0.08
W81	M	84	K	-	G2	pT2	krwiomocz	TAK	surowica	33.94	34.5	34.22	0.4	29.93	29.75	29.84	0.13	4.38	2.2	0.22
W208	M	84	K	+	G3	pT2	krwiomocz	NIE	serum +urine	31.73	32.44	32.09	0.5	29.42	29.33	29.37	0.06	2.72	0.54	0.69
W146	K	82	N	+	G3	pT1	krwiomocz, tamponada pęcherza	NIE	serum	34.21	34.72	34.47	0.36	29.21	29.42	29.31	0.15	5.15	2.97	0.13
W87	M	69	P	+	G3	pT2	krwiomocz	TAK	serum	31.48	32.09	31.79	0.43	28.76	28.58	28.67	0.13	3.12	0.94	0.52
W100	M	56	P	+	G2	pT1	krwiomocz	NIE	serum	35.16	35.57	35.37	0.29	28.88	28.78	28.83	0.07	6.54	4.36	0.05
W119	M	65	P	+	G2	pT1	krwiomocz	NIE	serum	33.16	33.87	33.52	0.5	29.5	29.7	29.6	0.14	3.92	1.74	0.3
W122	M	83	P	+	G2	pTa	krwiomocz	NIE	serum	31.21	31.42	31.32	0.15	29.39	29.31	29.35	0.06	1.97	-0.21	1.16
W127	M	62	K	+	G1	pT1	krwiomocz	NIE	serum	31.49	31.2	31.34	0.21	29.21	29.65	29.43	0.31	1.91	-0.27	1.2
W130	M	67	N	-	G1	pTa	guz na USG pęcherza	NIE	serum	33.29	34	33.64	0.5	29.33	29.67	29.5	0.24	4.15	1.97	0.26
W131	M	55	K	+	G2	pTa	krwiomocz	NIE	serum	31.74	31.54	31.64	0.14	29.8	30.34	30.07	0.38	1.57	-0.61	1.52
W132	M	60	P	+	G2	pTa	krwiomocz+ skrzepy krwi w moczu	NIE	serum	33.06	33.47	33.26	0.29	29.12	29.34	29.23	0.16	4.03	1.86	0.28
W160	K	52	K	-	G1	pT1	krwiomocz	NIE	serum	30.4	30.11	30.25	0.21	29.69	29.6	29.65	0.06	0.6	-1.57	2.98
W167	M	69	N	-	G1	pTa	krwiomocz	NIE	serum	32.39	32.37	32.38	0.01	29.35	29.67	29.51	0.23	2.86	0.68	0.62
W228	K	84	K	-	G1	pTa	krwiomocz	TAK	serum +urine	33.8	33.38	33.59	0.29	29.64	29.06	29.35	0.41	4.24	2.06	0.24
W229	K	39	N	-	G1	pTa	krwiomocz	NIE	serum +urine	33.36	33.28	33.32	0.05	29.93	29.41	29.67	0.37	3.65	1.47	0.36
W230	M	62	N	-	G3	pT2	krwiomocz	NIE	serum +urine	35.48	35.3	35.39	0.12	30.28	30.02	30.15	0.18	5.24	3.06	0.12
W231	M	71	K	+	G1	pTa	guz na USG pęcherza	NIE	serum +urine	34.33	34.03	34.18	0.21	29.19	28.93	29.06	0.18	5.12	2.94	0.13
W232	M	68	P	-	G1	pTa	krwiomocz	NIE	serum +urine	31.79	31.69	31.74	0.07	30.04	29.74	29.89	0.21	1.85	-0.33	1.26
W235	M	84	K	-	G1	pTa	guz na USG pęcherza	NIE	serum +urine	33.24	33.06	33.15	0.12	29.71	29.11	29.41	0.42	3.74	1.56	0.34
W233	M	75	K	-	G1	pTa	krwiomocz	NIE	serum +urine	32.27	32.13	32.2	0.1	29.27	28.59	28.93	0.48	3.27	1.09	0.47
W237	M	70	K	-	G3	pT2	krwiomocz+ skrzepy krwi w moczu	NIE	serum +urine	31.62	31.28	31.45	0.24	29.43	29.05	29.24	0.27	2.21	0.03	0.98
W238	M	65	P	-	G3	pT1	krwiomocz	TAK	serum +urine	34.33	34.17	34.25	0.11	28.37	28.09	28.23	0.2	6.02	3.84	0.07
W239	M	64	N	-	G1	pTa	guz na USG pęcherza	TAK	serum +urine	37.07	36.27	36.67	0.56	29.64	29.22	29.43	0.3	7.24	5.06	0.03
W240	M	71	K	-	G3	pT1	krwiomocz, bóle podbrzusza	TAK	serum +urine	29.22	29.02	29.12	0.14	28.85	28.79	28.82	0.04	1.97	-0.21	1.16
W241	M	70	K	+	G1	pTa	krwiomocz	TAK	serum +urine	29.5	29.28	29.39	0.16	29.45	29.07	29.26	0.27	3.97	1.79	0.29
W242	K	79	K	-	G1	pTa	krwiomocz	TAK	serum +urine	29.11	28.93	29.02	0.13	29.8	29.38	29.59	0.3	4.36	2.18	0.22
W228m	K	84	K	-	G1	pTa	krwiomocz	TAK	serum +urine	32.72	32.48	32.6	0.17	30.18	29.94	30.06	0.17	2.54	0.36	0.78
W229m	K	39	N	-	G1	pTa	krwiomocz	NIE	serum +urine	29.23	28.95	29.09	0.2	29.31	29.23	29.27	0.06	-0.18	-2.36	5.14
W230m	M	62	N	-	G3	pT2	krwiomocz	NIE	serum +urine	31.08	30.98	31.03	0.07	28.99	28.85	28.92	0.1	2.11	-0.07	1.05
W231m	M	71	K	+	G1	pTa	guz na USG pęcherza	NIE	serum +urine	28.52	28.38	28.45	0.1	27.77	27.71	27.74	0.04	0.71	-1.47	2.78
W232m	M	68	P	-	G1	pTa	krwiomocz	NIE	serum +urine	29.59	29.13	29.36	0.32	28.72	28.52	28.62	0.14	0.74	-1.44	2.72
W235m	M	84	K	-	G1	pTa	guz na USG pęcherza	NIE	serum +urine	30.26	29.86	30.06	0.28	29.55	29.35	29.45	0.14	0.61	-1.57	2.98
W233m	M	75	K	-	G1	pTa	krwiomocz	NIE	serum +urine	31.07	30.91	30.99	0.11	29.65	29.51	29.58	0.1	1.41	-0.77	1.71
W237m	M	70	K	-	G3	pT2	krwiomocz+ skrzepy krwi w moczu	NIE	serum +urine	27.92	27.62	27.77	0.21	28.27	27.49	27.88	0.55	-0.11	-2.29	4.9
W238m	M	65	P	-	G3	pT1	krwiomocz	TAK	serum +urine	28.52	28.2	28.36	0.22	28.21	28.03	28.12	0.13	0.24	-1.94	3.85
W239m	M	64	N	-	G1	pTa	guz na USG pęcherza	TAK	serum +urine	28.81	28.57	28.69	0.17	28.58	28.46	28.52	0.08	0.17	-2.01	4.02
W240m	M	71	K	-	G3	pT1	krwiomocz, bóle podbrzusza	TAK	serum +urine	29.65	29.33	29.49	0.23	29.59	29.17	29.38	0.3	-0.07	-2.25	4.76
W241m	M	70	K	+	G1	pTa	krwiomocz	TAK	serum +urine	29.09	28.95	29.02	0.1	28.72	28.26	28.49	0.33	1.02	-1.16	2.23
W242m	K	79	K	-	G1	pTa	krwiomocz	TAK	serum +urine	28.64	28.58	28.61	0.04	28.84	28.72	28.78	0.08	1.06	-1.12	2.17

## Sheet: Arkusz2
	miRNA 130b-3				TB1				ΔCt kalibrator
próbka	Ct1	Ct2	Ctśr	SD	Ct1	Ct2	Ctśr	SD
L38	32.4869	32.33	32.4085	0.110952	29.986	29.7592	29.8726	0.160363	2.53585
L39	27.0262	27.4711	27.2486	0.314609	28.7534	28.6611	28.7072	0.0652598	-1.4586
L62	34.1144	34.451	34.2827	0.238004	28.8842	28.7673	28.8257	0.0826926	5.45702
								śr.:	2.17809
