# Supplementary material for: Expression Profile of Micrornas (106b-3p, 130b-3, 145-3p and 199a-5p) in Urine and Serum Samples From Patients With the Diagnosis of Bladder Cancer
Source: Research Square preprint supplement (doi:10.21203/rs.3.rs-86217/v1), 2020-10-08
Supplement: Supplementary file 2 [file cba1cb255644e30b1ceadbce.xlsx]

## Sheet: Arkusz1
										miRNA 199a-5p				TB1										ΔCt kalibrator
nr	gender	age	P- current smoker K-used to smoke N- necer smoke	exposition	Grade	Stage	cause of admission to hospital	recurrence	matherial	Ct1	Ct2	Ctśr	SD	Ct1	Ct2	Ctśr	SD	ΔCt	ΔΔCt	expression R				0.01
W202m	M	60	P	-	G1	pTa	krwiomocz, bóle podbrzusza	NIE	serum+ urine	31.5	31.11	31.31	0.28	31.35	31.96	31.66	0.43	-0.35	-0.36	1.29
W208m	M	84	K	+	G3	pT2	krwiomocz	NIE	serum+ urine	31.02	31.14	31.08	0.09	31.64	31.49	31.56	0.11	-0.48	-0.49	1.41
W200m	K	59	P	-	G2	pTa	krwiomocz	TAK	serum+ urine	30.83	30.15	30.49	0.48	31.69	31.43	31.56	0.18	-1.07	-1.08	2.11
W201m	M	61	P	+	G2	pT2	krwiomocz+ skrzepy krwi w moczu, zatrzymanie moczu	NIE	serum+ urine	30.09	30.35	30.22	0.19	31.72	31.47	31.6	0.18	-1.38	-1.39	2.62
W205m	M	65	N	-	G1	pTa	krwiomocz	NIE	serum+ urine	30.98	30.7	30.84	0.2	31.19	31.56	31.37	0.26	-0.53	-0.54	1.46
W203m	K	51	N	-	G1	pTa	częstomocz, parcie na mocz	NIE	serum+ urine	30.05	30.38	30.21	0.23	30.37	30.12	30.24	0.18	-0.03	-0.04	1.03
W207m	M	56	K	-	G3	pT2	krwiomocz+ skrzepy krwi w moczu	NIE	serum+ urine	30.22	30.43	30.33	0.15	31.38	31.1	31.24	0.19	-0.91	-0.92	1.9
W200	K	59	P	-	G2	pTa	krwiomocz	TAK	serum+ urine	31.81	31.67	31.74	0.1	32.16	32.56	32.36	0.29	-0.62	-0.63	1.55
W201	M	61	P	+	G2	pT2	krwiomocz+ skrzepy krwi w moczu, zatrzymanie moczu	NIE	serum+ urine	31.58	31.71	31.65	0.09	31.73	31.65	31.69	0.06	-0.04	-0.05	1.04
W202	M	60	P	-	G1	pTa	krwiomocz, bóle podbrzusza	NIE	serum+ urine	31.92	31.65	31.78	0.19	31.7	31.92	31.81	0.16	-0.03	-0.04	1.03
W104	M	65	K	-	G2	pT1	krwiomocz	NIE	serum	32	32.06	32.03	0.05	32.29	32.18	32.23	0.08	-0.2	-0.21	1.16
W106	M	69	K	-	G3	pT1	krwiomocz	NIE	serum	31.71	31.47	31.59	0.17	32.12	32.49	32.31	0.27	-0.72	-0.73	1.66
W108	K	82	K	-	G2	pT2	krwiomocz	NIE	serum	32.05	32.11	32.08	0.04	32.12	32.62	32.37	0.35	-0.3	-0.31	1.24
W47	M	85	K	-	G3	pT2	krwiomocz	TAK	serum	31.92	31.33	31.63	0.42	32.52	32.87	32.69	0.25	-1.07	-1.08	2.11
W115	M	62	K	-	G2	pT2	krwiomocz	NIE	serum	32.11	31.96	32.03	0.11	32.3	32.11	32.21	0.14	-0.17	-0.18	1.13
W117	K	76	K	-	G2	pT1	krwiomocz	NIE	serum	32.09	32.37	32.23	0.2	32.46	32.14	32.3	0.23	-0.07	-0.08	1.06
W193	M	63	P	-	G2	pT2	krwiomocz+ skrzepy krwi w moczu	NIE	serum	32.06	32.48	32.27	0.29	32.5	32.31	32.4	0.14	-0.14	-0.15	1.11
W194	K	77	K	-	G2	pT1	krwiomocz+ skrzepy krwi w moczu	NIE	serum	32.27	32.57	32.42	0.21	31.59	31.9	31.74	0.22	0.68	0.67	0.63
W195	M	73	K	+	G3	pT1	krwiomocz	NIE	serum	31.86	31.39	31.63	0.33	31.27	31.35	31.31	0.06	0.32	0.31	0.81
W197	K	64	K	-	G2	pTa	krwiomocz	NIE	serum	31.39	31.13	31.26	0.19	32.15	32.34	32.24	0.13	-0.98	-0.99	1.99
W203	K	51	N	-	G1	pTa	częstomocz, parcie na mocz	NIE	serum+ urine	31.64	31.01	31.32	0.45	32.19	32.42	32.31	0.16	-0.98	-0.99	1.99
W204	M	66	P	-	G1	pTa	krwiomocz	NIE	serum	31.83	31.46	31.65	0.27	31.91	31.65	31.78	0.18	-0.13	-0.14	1.1
W205	M	65	N	-	G1	pTa	krwiomocz	NIE	serum+ urine	31.52	31.38	31.45	0.1	31.92	31.55	31.73	0.26	-0.28	-0.29	1.23
W207	M	56	K	-	G3	pT2	krwiomocz+ skrzepy krwi w moczu	NIE	serum+ urine	31.39	31.23	31.31	0.11	32.56	32.82	32.69	0.18	-1.37	-1.38	2.61
W81	M	84	K	-	G2	pT2	krwiomocz	TAK	surowica	31.63	31.42	31.53	0.15	32.81	32.87	32.84	0.04	-1.31	-1.32	2.5
W208	M	84	K	+	G3	pT2	krwiomocz	NIE	serum+ urine	32.07	32.12	32.09	0.03	32.04	32.3	32.17	0.18	-0.07	-0.08	1.06
W146	K	82	N	+	G3	pT1	krwiomocz, tamponada pęcherza	NIE	serum	32.12	32.7	32.41	0.41	32.19	32.33	32.26	0.1	0.16	0.15	0.9
W87	M	69	P	+	G3	pT2	krwiomocz	TAK	serum	31.74	31.37	31.55	0.26	31.71	31.5	31.61	0.15	-0.05	-0.06	1.05
W100	M	56	P	+	G2	pT1	krwiomocz	NIE	serum	31.68	31.4	31.54	0.2	31.81	31.41	31.61	0.28	-0.07	-0.08	1.05
W119	M	65	P	+	G2	pT1	krwiomocz	NIE	serum	31.65	31.85	31.75	0.14	32.15	32.11	32.13	0.03	-0.38	-0.39	1.31
W122	M	83	P	+	G2	pTa	krwiomocz	NIE	serum	31.68	31.34	31.51	0.24	31.77	31.84	31.81	0.05	-0.3	-0.31	1.24
W127	M	62	K	+	G1	pT1	krwiomocz	NIE	serum	32.09	32.2	32.14	0.08	31.44	31.55	31.5	0.08	0.65	0.64	0.64
W130	M	67	N	-	G1	pTa	guz na USG pęcherza	NIE	serum	32.07	32.2	32.13	0.1	32.04	32.39	32.22	0.25	-0.08	-0.09	1.07
W131	M	55	K	+	G2	pTa	krwiomocz	NIE	serum	31.57	32.01	31.79	0.31	31.33	31.15	31.24	0.13	0.55	0.54	0.69
W132	M	60	P	+	G2	pTa	krwiomocz+ skrzepy krwi w moczu	NIE	serum	31.33	31.47	31.4	0.1	32.29	32.68	32.48	0.27	-1.08	-1.09	2.13
W160	K	52	K	-	G1	pT1	krwiomocz	NIE	serum	31.72	31.21	31.46	0.36	32.04	32.29	32.17	0.18	-0.7	-0.71	1.64
W167	M	69	N	-	G1	pTa	krwiomocz	NIE	serum	31.89	31.3	31.6	0.42	31.39	31.29	31.34	0.07	0.26	0.25	0.84
W228	K	84	K	-	G1	pTa	krwiomocz	TAK	serum+ urine	31.37	30.81	31.09	0.4	32.26	31.92	32.09	0.24	-1	-1.01	2.02
W229	K	39	N	-	G1	pTa	krwiomocz	NIE	serum+ urine	31.68	31.06	31.37	0.44	31.7	31.22	31.46	0.34	-0.09	-0.1	1.07
W230	M	62	N	-	G3	pT2	krwiomocz	NIE	serum+ urine	32.34	32.28	32.31	0.04	32.61	32.47	32.54	0.1	-0.23	-0.24	1.18
W231	M	71	K	+	G1	pTa	guz na USG pęcherza	NIE	serum+ urine	31.11	30.73	30.92	0.27	32.05	31.91	31.98	0.1	-1.06	-1.07	2.11
W232	M	68	P	-	G1	pTa	krwiomocz	NIE	serum+ urine	32.17	31.75	31.96	0.3	32.2	32.02	32.11	0.13	-0.15	-0.16	1.12
W235	M	84	K	-	G1	pTa	guz na USG pęcherza	NIE	serum+ urine	32.99	32.81	32.9	0.13	32.59	32.11	32.35	0.34	0.55	0.54	0.69
W233	M	75	K	-	G1	pTa	krwiomocz	NIE	serum+ urine	31.75	31.09	31.42	0.47	31.89	31.85	31.87	0.03	-0.45	-0.46	1.38
W237	M	70	K	-	G3	pT2	krwiomocz+ skrzepy krwi w moczu	NIE	serum+ urine	31.36	31.04	31.2	0.23	32.34	32.28	32.31	0.04	-1.11	-1.12	2.17
W238	M	65	P	-	G3	pT1	krwiomocz	TAK	serum+ urine	31.58	31.28	31.43	0.21	31.46	31.26	31.36	0.14	0.07	0.06	0.96
W239	M	64	N	-	G1	pTa	guz na USG pęcherza	TAK	serum+ urine	32.33	32.21	32.27	0.08	33.55	33.35	33.45	0.14	-1.18	-1.19	2.28
W240	M	71	K	-	G3	pT1	krwiomocz, bóle podbrzusza	TAK	serum+ urine	32.03	31.59	31.81	0.31	31.96	31.82	31.89	0.1	0.31	0.3	0.81
W241	M	70	K	+	G1	pTa	krwiomocz	TAK	serum+ urine	32.16	32.08	32.12	0.06	32.64	32.12	32.38	0.37	-0.96	-0.97	1.96
W242	K	79	K	-	G1	pTa	krwiomocz	TAK	serum+ urine	31.12	30.92	31.02	0.14	31.01	30.61	30.81	0.28	-0.44	-0.45	1.37
W228m	K	84	K	-	G1	pTa	krwiomocz	TAK	serum+ urine	31.26	31.08	31.17	0.13	31.33	31.21	31.27	0.08	-0.1	-0.11	1.08
W229m	K	39	N	-	G1	pTa	krwiomocz	NIE	serum+ urine	29.24	29.06	29.15	0.13	30.47	30.41	30.44	0.04	-1.29	-1.3	2.43
W230m	M	62	N	-	G3	pT2	krwiomocz	NIE	serum+ urine	32.27	32.11	32.19	0.11	32.21	32.03	32.12	0.13	0.07	0.06	1.04
W231m	M	71	K	+	G1	pTa	guz na USG pęcherza	NIE	serum+ urine	29.89	29.75	29.82	0.1	31.16	31.1	31.13	0.04	-1.31	-1.32	2.56
W232m	M	68	P	-	G1	pTa	krwiomocz	NIE	serum+ urine	30.34	30.12	30.23	0.16	31.32	31.1	31.21	0.16	-0.98	-0.99	1.99
W235m	M	84	K	-	G1	pTa	guz na USG pęcherza	NIE	serum+ urine	31.12	31.02	31.07	0.07	31.21	31.09	31.15	0.08	-0.08	-0.09	0.94
W233m	M	75	K	-	G1	pTa	krwiomocz	NIE	serum+ urine	31.03	30.79	30.91	0.17	31.46	31.08	31.27	0.27	-0.36	-0.37	1.29
W237m	M	70	K	-	G3	pT2	krwiomocz+ skrzepy krwi w moczu	NIE	serum+ urine	30.92	30.68	30.8	0.17	31.6	31.42	31.51	0.13	-0.71	-0.72	1.65
W238m	M	65	P	-	G3	pT1	krwiomocz	TAK	serum+ urine	30.3	30.18	30.24	0.08	30.52	30.4	30.46	0.08	-0.22	-0.23	1.17
W239m	M	64	N	-	G1	pTa	guz na USG pęcherza	TAK	serum+ urine	31.88	31.62	31.75	0.18	33.15	32.95	33.05	0.14	-1.3	-1.31	2.48
W240m	M	71	K	-	G3	pT1	krwiomocz, bóle podbrzusza	TAK	serum+ urine	33.08	32.96	33.02	0.08	33.19	33.05	33.12	0.1	0.05	0.04	0.97
W241m	M	70	K	+	G1	pTa	krwiomocz	TAK	serum+ urine	31.71	31.53	31.62	0.13	32.12	31.62	31.87	0.35	-1.06	-1.07	2.1
W242m	K	79	K	-	G1	pTa	krwiomocz	TAK	serum+ urine	31.64	31.28	31.46	0.25	31.31	31.17	31.24	0.1	-0.92	-0.93	1.91

## Sheet: Arkusz2
	miRNA 199a-5p				TB1				ΔCt kalibrator
próbka	Ct1	Ct2	Ctśr	SD	Ct1	Ct2	Ctśr	SD
L38	32.4099	32.0635	32.2367	0.244953	32.3071	32.5109	32.409	0.144147	-0.17226
L39	31.0139	31.582	31.298	0.401685	31.0452	31.312	31.1786	0.188695	0.119377
L62	31.4326	31.6291	31.5309	0.138943	31.5561	31.3109	31.4335	0.173339	0.0973558
								śr.:	0.0148243
